# Supplementary material
Source: publisher figshare collection journal article supplement (https://karger.figshare.com/ndownloader/files/13236659)

## **Supplemental Data**

### **Legend:**

Kaplan Meier analysis for overall and cardiovascular survival by SVi

(Fig.S1 A and S1B ) and by FR (Fig. S2 A and S2 B), showing similar lower survival rates in patients with low SVi and low FR in comparison with normal SVi and normal FR.

Fig. S1 A. Overall survival curves by SV<sub>i</sub>

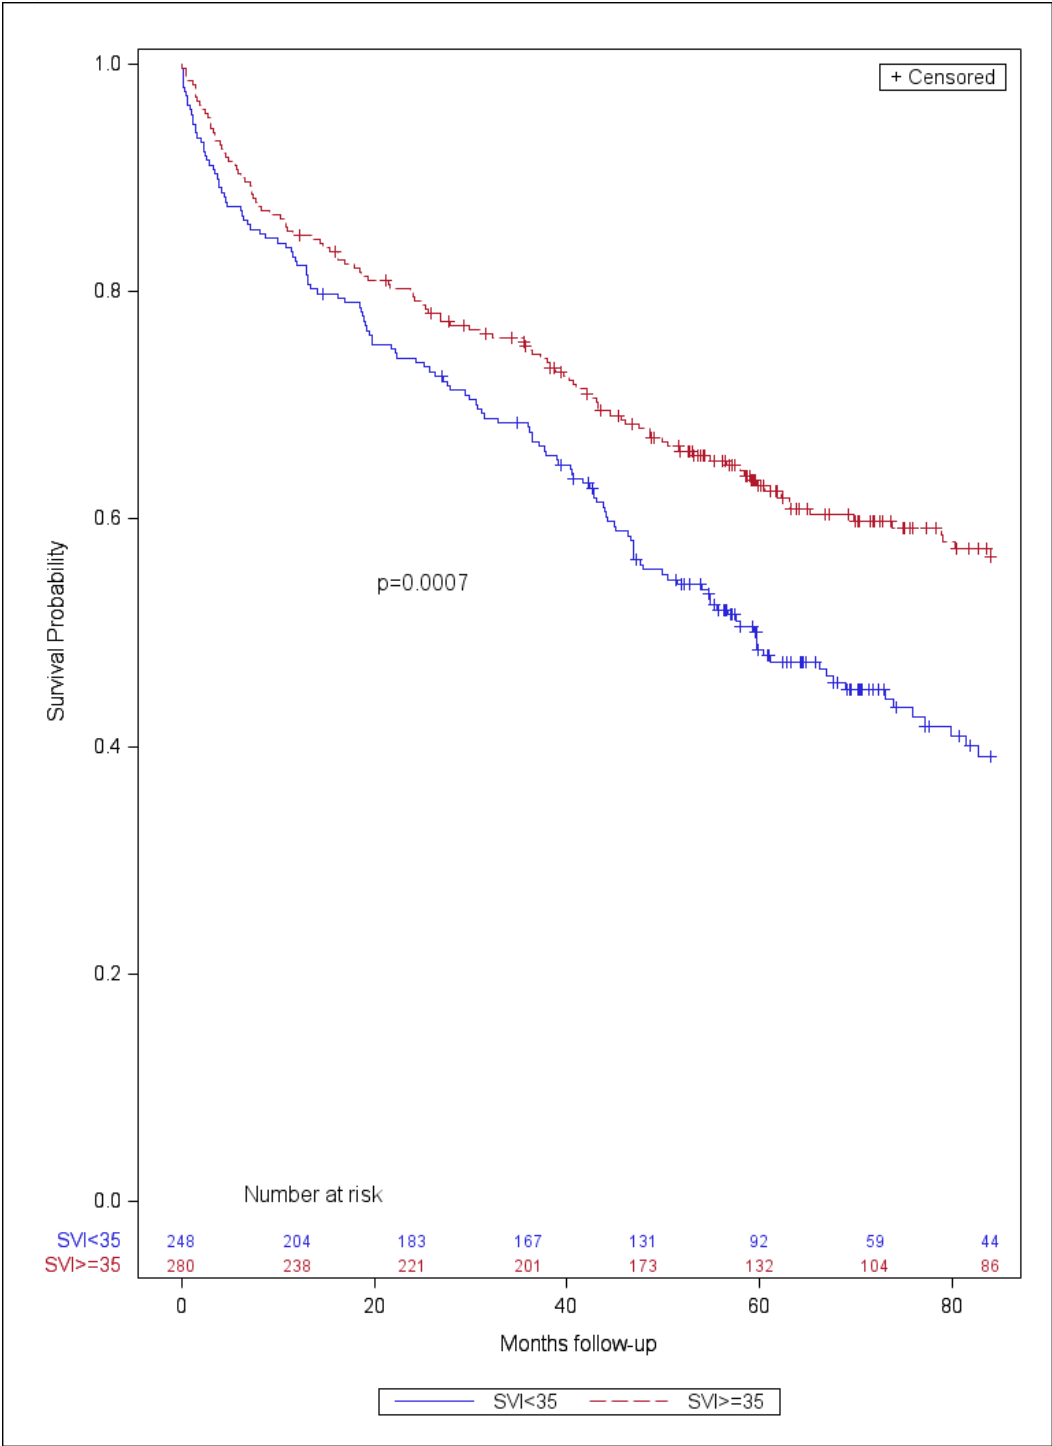

Fig. S1 B . Cardiovascular survival curves by SV<sub>i</sub>

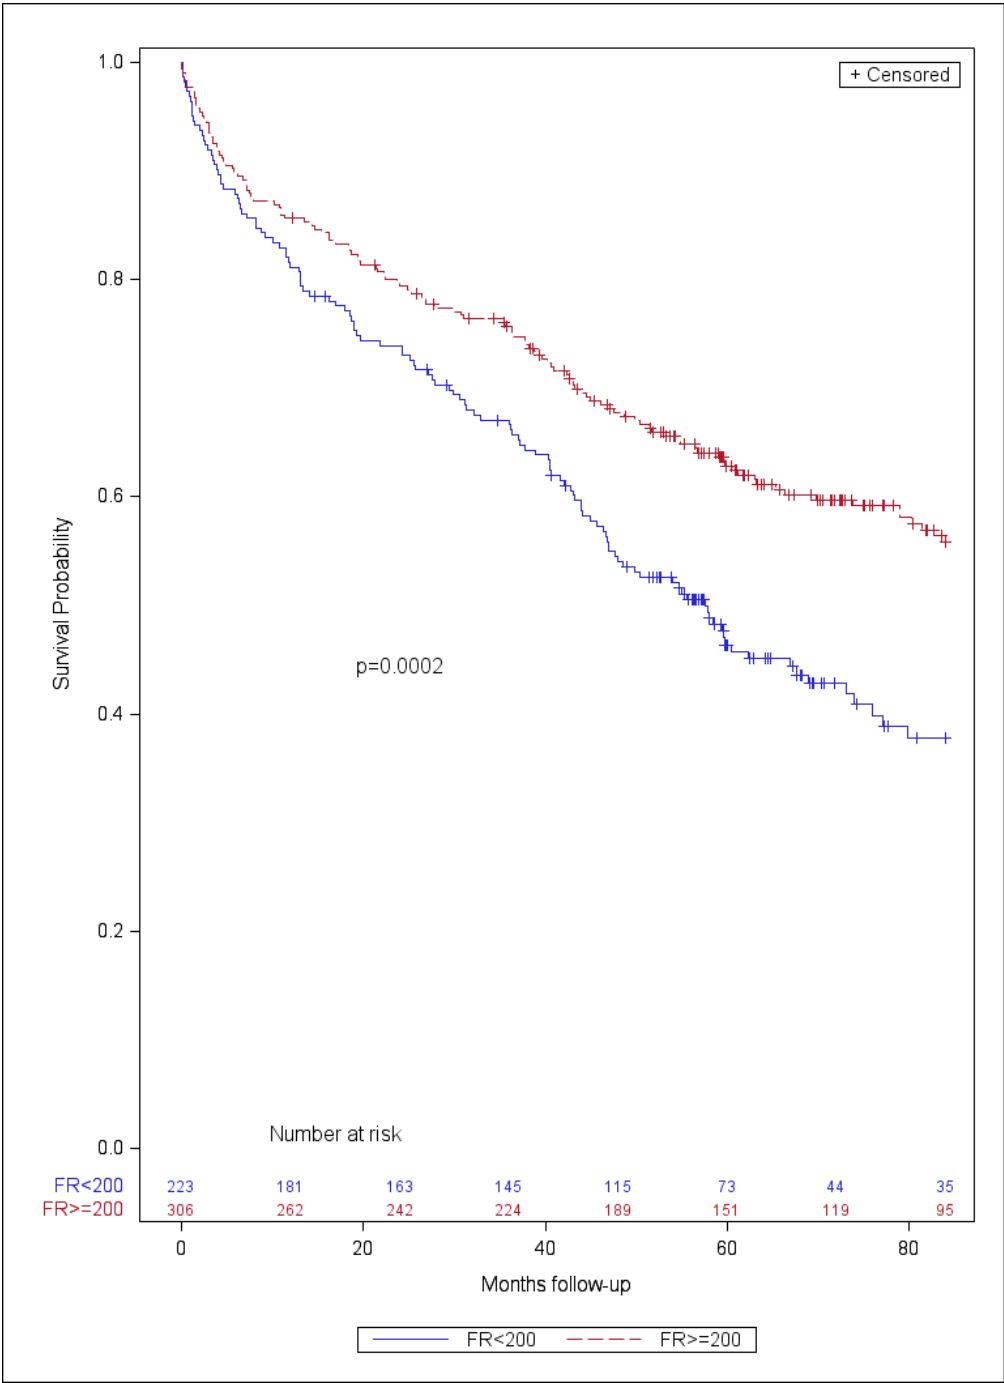

Fig. S2 A: Overall survival curves by FR

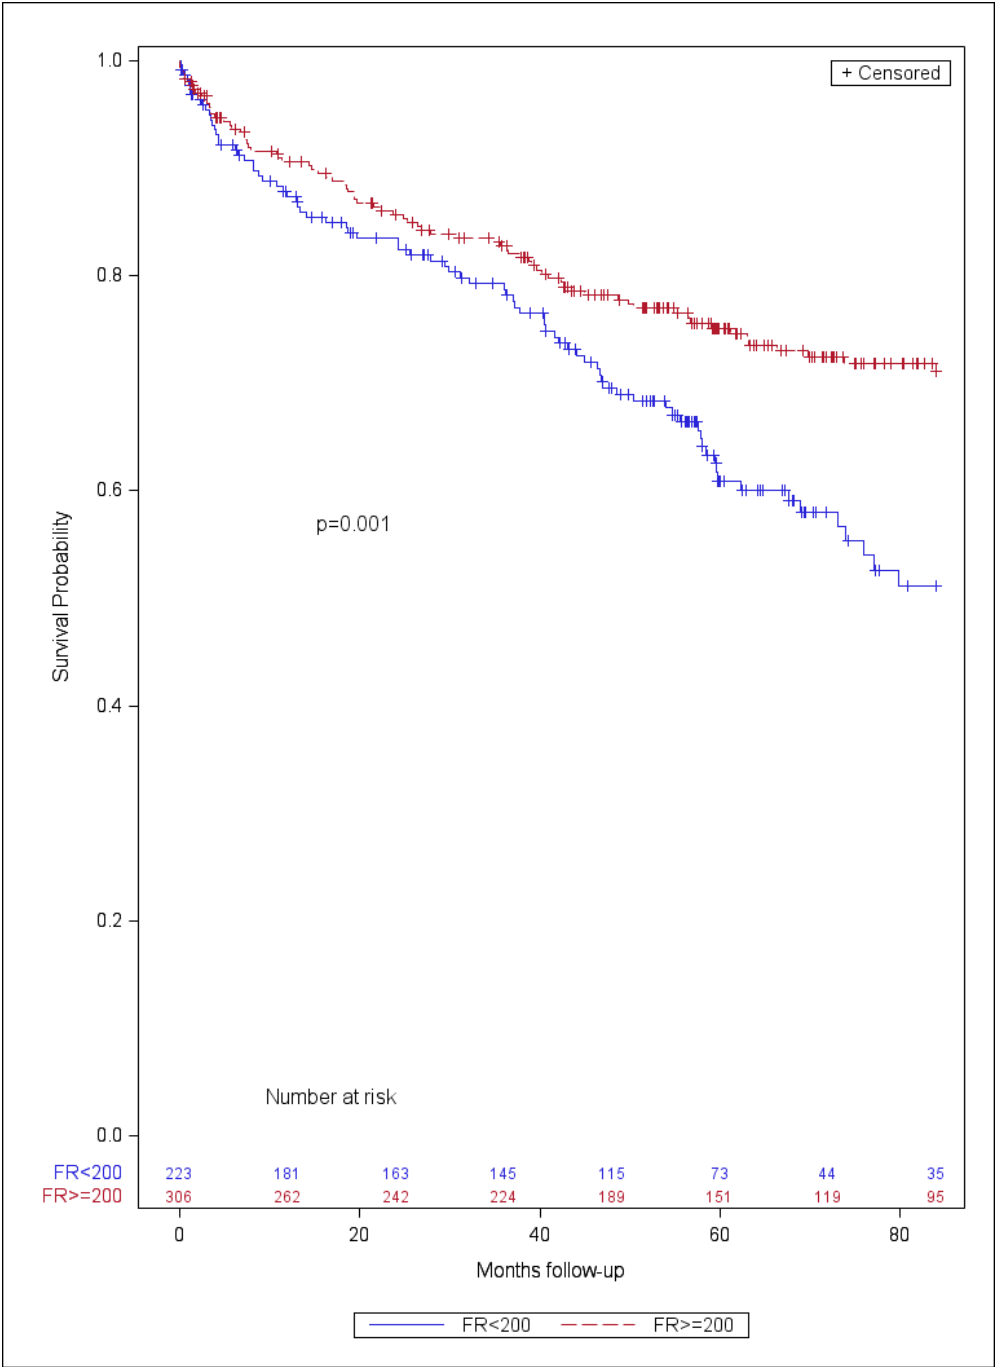

Fig. S2 B: Cardiovascular survival curves by FR

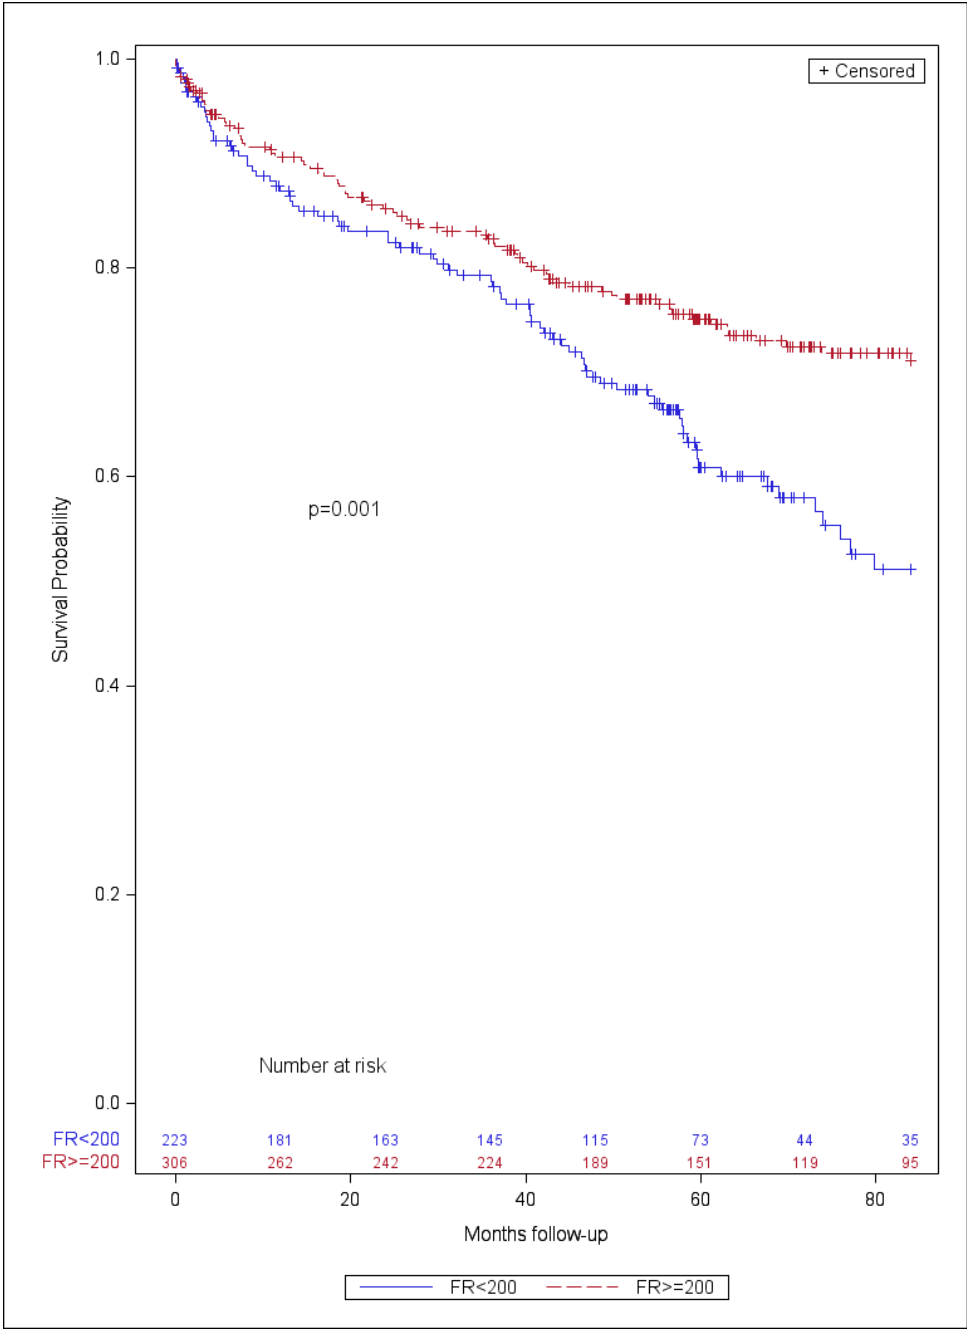

Supplement: Supplementary file 1 [file 13236659]
